# Supplementary material
Source: HighWire-hosted journal article supplement (https://bmjopen.bmj.com/content/11/12/e055350)
Supplement: inline-supplementary-material-3 [file inline-supplementary-material-3.pdf]

**Supplementary 3 Characteristics of the villagers in the focus group discussions**

| No. | Village | Content    | ID    | Unique ID | Participants            |
|-----|---------|------------|-------|-----------|-------------------------|
| 1   | A       | Male FGD   | 5.59  | BM1.1     | 60s, Retiree            |
|     |         |            | 2.67  | BM1.2     | 40s, Teacher            |
|     |         |            | 2.112 | BM1.3     | 40s, Government servant |
|     |         |            | 4.113 | BM1.4     | 20s, Soldier            |
| 2   | A       | Male FGD   | 6.69  | BM2.1     | 50s, Farmer             |
|     |         |            | 5.126 | BM2.2     | 20s, Farmer             |
|     |         |            | 5.129 | BM2.3     | 50s, Farmer             |
| 3   | A       | Female FGD | 5.6   | BF1.1     | 30s, Businesswoman      |
|     |         |            | 6.50  | BF1.2     | 50s, Farmer             |
|     |         |            | 2.102 | BF1.3     | 40s, Farmer             |
| 4   | A       | Female FGD | 1.122 | BF2.1     | 30s, Farmer             |
|     |         |            | 4.139 | BF2.2     | 40s, Farmer             |
|     |         |            | 3.140 | BF2.3     | 40s, Government servant |
| 5   | B       | Male FGD   | 3.61  | NM1.1     | 20s, Government servant |
|     |         |            | 3.76  | NM1.2     | 30s, Farmer             |
|     |         |            | 4.77  | NM1.3     | 20s, Farmer             |
| 6   | B       | Male FGD   | 4.87  | NM2.1     | 30s, Farmer             |
|     |         |            | 3.89  | NM2.2     | 30s, Farmer             |
|     |         |            | 1.91  | NM2.3     | 10s, Farmer             |
| 7   | B       | Male FGD   | 2.93  | NM3.1     | 40s, Farmer             |
|     |         |            | 1.95  | NM3.2     | 30s, Farmer             |
|     |         |            | 1.102 | NM3.3     | 20s, Farmer             |
| 8   | B       | Female FGD | 5.41  | NF1.1     | 40s, Farmer             |
|     |         |            | 1.54  | NF1.2     | 40s, Farmer             |
|     |         |            | 2.55  | NF1.3     | 40s, Farmer             |
| 9   | B       | Female FGD | 1.98  | NF2.1     | 20s, Farmer             |
|     |         |            | 2.101 | NF2.2     | 20s, Farmer             |
|     |         |            | 3.106 | NF2.3     | 30s, Farmer             |
| 10  | B       | Female FGD | 3.99  | NF3.1     | 20s, Farmer             |
|     |         |            | 4.100 | NF3.2     | 40s, Farmer             |
|     |         |            | 2.104 | NF3.3     | 20s, Farmer             |
