# Supplementary material
Source: HighWire-hosted journal article supplement (https://bmjopen.bmj.com/content/11/12/e055350)
Supplement: inline-supplementary-material-6 [file inline-supplementary-material-6.pdf]

**Supplementary 6 Themes from the in-depth interviews of the healthcare workers**

| Themes                                                                  | Quotes, Unique ID                                                                                                                                                                                                                                                                                                                                                                                                                                                                                                                                                                                                                                               |
|-------------------------------------------------------------------------|-----------------------------------------------------------------------------------------------------------------------------------------------------------------------------------------------------------------------------------------------------------------------------------------------------------------------------------------------------------------------------------------------------------------------------------------------------------------------------------------------------------------------------------------------------------------------------------------------------------------------------------------------------------------|
| Mentioning about the National Health Insurance (“ <i>Kor Por Sor</i> ”) | <ol style="list-style-type: none"> <li>1. Now there is the ‘<i>Kor Por Sor</i>’ (National Health Insurance) system, where you have to pay only 5000 kip, they will come even when they have common cold. <i>BH1, 30s Female</i></li> <li>2. Because of ‘<i>Kor Por Sor</i>’ (National Health Insurance), more people come to seek treatment at this health center. <i>NH1, 30s Male</i></li> <li>3. Because of ‘<i>Kor Por Sor</i>’ (National Health Insurance), we have more patients who come here for treatment. <i>NH2, 30s Female</i></li> </ol>                                                                                                           |
| Expressing opinion towards malaria elimination                          | <ol style="list-style-type: none"> <li>1. Yes, you can eliminate malaria. You should sleep under the long-lasting insecticide-treated bed nets. In addition, we should also train the village health volunteers to use the rapid diagnostic test (RDT) so we can eliminate malaria. <i>BH1, 30s Female</i></li> <li>2. It’s difficult to eliminate because people here make a living by going to the mountains, to the forests. We can’t stop them from going. They need to make a living. <i>NH2, 30s Female</i></li> <li>3. You can’t eliminate 100%. People here work in the field, go to the forest, go to the mountains. <i>NH3, 20s Female</i></li> </ol> |
| Describing an illness using local terms                                 | <ol style="list-style-type: none"> <li>1. I heard the villagers mentioned ‘<i>luad niao</i>’, ‘<i>luad niao</i>’, is there such thing? <i>BH2, 40s Female</i></li> </ol>                                                                                                                                                                                                                                                                                                                                                                                                                                                                                        |
| Describing the villagers’ health-seeking behavior                       | <ol style="list-style-type: none"> <li>1. Yes, when they fall sick, they will go to the ‘<i>mor pee</i>’ (witch doctor) first. But only for some families. Usually the old. <i>BV1, 50s Male</i></li> <li>2. The villagers come to the health center directly as we do not encourage them to go the village health volunteer first. I am afraid that the village health volunteer do not know the right way to treat the patients. <i>BH2, 40s Female</i></li> </ol>                                                                                                                                                                                            |
| Feeling towards the job                                                 | <ol style="list-style-type: none"> <li>1. I am proud of my work. I am a nurse but I also function as a ‘doctor’ here. I have to work more than what I studied. It is very challenging sometimes but the longer I work, the more experience</li> </ol>                                                                                                                                                                                                                                                                                                                                                                                                           |

---

I have. *NH2, 30s Female*

2. I am satisfied with my work. Because this work can save lives.

*NV1, 50s Male*

---

Expressing hope to improve the health center

1. The knowledge and capability. I want to learn more. Another thing is the building. Too small. When people are sick they can't sleep here. If possible, I hope for more advanced equipment too.

*NH1, 30s Male*

2. I hope the health center will be expanded. I also want to have machines that can check blood or Echo machine. I also hope that a medical doctor will be stationed here. *NH2, 30s Female*

3. At this health center the manpower is not enough, we also do not have enough knowledge. I hope people with knowledge will come here to work at this health center. I also hope this health center will be expanded. It is very crowded when there are many sick people and people who give birth. *NH3, 20s Female*

---

Expressing hope to improve the living condition of the people

1. I hope there will be toilets in every house. *NV1, 50s Male*
-
